# Supplementary material for: Behavioral Alterations and Decreased Number of Parvalbumin-Positive Interneurons in Wistar Rats after Maternal Immune Activation by Lipopolysaccharide: Sex Matters
Source: Int J Mol Sci. 2021 Mar 23;22(6):3274. doi: 10.3390/ijms22063274 (PMC8004756; doi:10.3390/ijms22063274)
Supplement: Supplementary file 1 [file ijms-22-03274-s001.xlsx]

## Sheet: No. of animals
Table S1	Number of analyzed and excluded animals.
Brain analysis	Number of analyzed / excluded animals
	P28 (juveniles)
	saline males		LPS males		saline females		LPS females
Brain area	n = 6	/ 0	n = 10	/ 0	n = 10	/ 0	n = 10	/ 0
Cortical thickness	n = 6	/ 0	n = 10	/ 0	n = 10	/ 0	n = 10	/ 0
Ventricle area / Brain area	n = 6	/ 0	n = 10	/ 0	n = 10	/ 0	n = 10	/ 0
Hippocampal area / Brain area	n = 6	/ 0	n = 10	/ 0	n = 10	/ 0	n = 10	/ 0
PV+ interneurons	n = 5	/ 0	n = 5	/ 0	n = 5	/ 0	n = 5	/ 0
Microglia	n = 5	/ 0	n = 5	/ 0	n = 5	/ 0	n = 5	/ 0
Behavior analysis	Number of analyzed / excluded animals
	P45 (adolescents)								P90 (adults)
	saline males		LPS males		saline females		LPS females		saline males		LPS males		saline females		LPS females
Open field test	n = 15	/ 0	n = 14	/ 0	n = 13	/ 0	n = 14	/ 0	n = 15	/ 0	n = 14	/ 0	n = 9	/ -4a	n = 11	/ -3a
Beam walking test	n = 15	/ 0	n = 14	/ 0	n = 13	/ 0	n = 14	/ 0	n = 15	/ 0	n = 14	/ 0	n = 10	/ -3a	n = 11	/ -3a
Elevated plus maze test	n = 15	/ 0	n = 14	/ 0	n = 13	/ 0	n = 14	/ 0	n = 15	/ 0	n = 13	/ -1b	n = 11	/ -2a	n = 11	/ -3a
Social interactions	n = 12 (6 pairs)	/ 0	n = 14 (7 pairs)	/ 0	n = 12 (6 pairs)	/ 0	n = 14 (7 pairs)	/ 0	n = 12 (6 pairs)	/ 0	n = 14 (7 pairs)	/ 0	n = 10 (5 pairs)	/ -2 (1 pair)a	n = 12 (6 pairs)	/ -2 (1 pair)a
Ultrasonic vocalization	n = 6 pairs	/ 0	n = 7 pairs	/ 0	n = 6 pairs	/ 0	n = 7 pairs	/ 0	n = 6 pairs	/ 0	n = 7 pairs	/ 0	n = 4 pairs	/ -2 pairsa,b	n = 5 pairs	/ -2 pairsb
Acoustic startle reaction	-		-		-		-		n = 13	/ -2b	n = 7	/ -7b	n = 10	/ -3a	n = 6	/ -8b
Prepulse inhibition	-		-		-		-		n = 13	/ -2b	n = 7	/ -7b	n = 10	/ -3a	n = 6	/ -8b
a females in estrus phase
b technical error
LPS = lipopolysaccharide
P = postnatal day
